# Supplementary material for: Mapping Global Diversity Patterns for Migratory Birds
Source: PLoS One. 2013 Aug 7;8(8):e70907. doi: 10.1371/journal.pone.0070907 (PMC3737225; doi:10.1371/journal.pone.0070907)
Supplement: File S2 — (XLS) [file pone.0070907.s004.xls]

## Sheet: Data
Source: IUCN Red List of Threatened Species (http://www.iucnredlist.org/)
Species name	Status	Breeding grounds	Non-breeding grounds	Narrow-range?	Threats
Acrocephalus griseldis	EN	Irak	E Africa	Yes (both)	Drainage of breeding habitat. Since the 1950s there has been considerable loss of its shallow, marshy wetland habitat due to large-scale hydrological projects throughout the Euphrates and Tigris river-basins
Acrocephalus paludicola	VU	Eastern Europe and W Russia	W Africa	Yes (both)	The major threat is the loss of breeding habitat owing to drainage for agriculture and peat extraction, damming of floodplains, unfavourable water management and the canalisation of rivers. In the wintering grounds, agricultural cultivation and irrigation (creation of rice and sugar cane plantations), drought, wetland drainage, intensive grazing, succession to scrub, desertification and salinisat…
Acrocephalus tangorum	VU	SE Russia and NE China	Thailand, Cambodia and S Laos	Yes (both)	The main threat on its breeding and wintering grounds is habitat loss (especially freshwater marsh in Thailand)
Agelaius tricolor	EN	California	California	Yes (both)	Loss of its upland nesting habitat
Amazona pretrei	VU	S Brazil	S Brazil	Yes (both)	Habitat loss due to deforestation and trapping
Ammodramus caudacutus	VU	NE USA	SE USA	Yes (both)	Urban development
Anarhynchus frontalis	VU	New Zealand	New Zealand	Yes (both)	Habitat degradation (encroachment of weeds as hydroelectric schemes reduce seasonal flushing of riverbeds, and land intensification in the high country) and introduced predators
Anas formosa	VU	Eastern Siberia	Japan, Korea, E China	No	Hunting. Agricultural development. Tourist development and pollution in wintering grounds in Korea.
Anodorhynchus leari	EN	NE Brazil	NE Brazil	Yes (both)	Hunting. Deforestation for livestock-grazing.
Anser cygnoides	VU	Mongolia, NE China, SE Russia	E China, Korea	No	Mostly in breeding grounds: drought, considerable pressure from habitat loss (particularly owing to agricultural development) and unsustainable levels of hunting.
Anthus spragueii	VU	N USA and Canada	S USA and N Mexico	Yes (July)	Conversion of prairie to seeded pasture, hayfields and cropland, and inappropriate grazing are responsible for habitat loss, degradation of remaining grassland.
Apus acuticauda	VU	Bhutan, NE India	N Thailand	Yes (both)	No known
Aquila clanga	VU	E Europe, Russia, Khazakstan, Mongolia, NE China.	Middle East, E Africa, N India, SouthEast Asia, E China	No	Habitat destruction and disturbance (agricultural intensification in eastern Europe), poaching (in Russia, the Mediterranean, South-E Asia and Africa) and poisoning and electrocution.
Aquila heliaca	VU	E Europe, Russia, Khazakstan, Mongolia, NE China.	Middle East, E Africa, N India, SouthEast Asia, E China	No	Breeding sites are threatened primarily by intensive forestry in the mountains, shortage of large indigenous trees in the lowlands, nest robbing and illegal trade, shooting, poisoning and electrocution by powerlines. Hunting, poisoning, prey depletion and other mortality factors are also likely to pose threats in wintering areas.
Ardea humbloti	EN	Madagascar	Madagascar	Yes (both)	Overexploitation and loss and degradation of its wetland habitats (modification and conversion for human use, particularly for rice cultivation)
Ardea insignis	CR	NE India	NE India and Bangladesh	Yes (both)	Loss, degradation and disturbance of forest and wetlands, as a result of pollution, rapid growth of aquatic vegetation,conversion to agriculture and the over-exploitation of wetland resources. Rivers act as busy transport routes for the human population, exacerbating disturbance of this species.
Ardeola idae	EN	Madagascar	E Africa	Yes (July)	Clearing, drainage and conversion of wetland habitats to rice fields. And breeding colonies are heavily and increasingly exploited for eggs and young
Aythya baeri	EN	SE Russia and NE China	S and E China, SouthEast Asia, NE India	No	Hunting and wetland destruction on both breeding and wintering grounds
Brachyramphus marmoratus	EN	W Canada and Alaska	W Canada and Alaska	No	Loss of nesting habitat: many areas of remaining old-growth forest used as nesting habitat are slated for logging.
Branta ruficollis	EN	Siberia	SE Europe, Turkey, Middle East	Yes (both)	Hunting. In wintering grounds, residential and tourist development boom, wheat cultivation.
Calidris tenuirostris	VU	NE Siberia	Australia, Indonesia, SouthEast Asia, India	Yes (July)	In the Chinese, North Korean and South Korean regions of the Yellow Sea (a major stopover area) the species is threatened by the degradation and loss of wetland habitats through environmental pollution.
Calyptorhynchus baudinii	EN	SW Australia	SW Australia	Yes (both)	Habitat loss for agriculture
Calyptorhynchus latirostris	EN	SW Australia	SW Australia	Yes (both)	Habitat loss for agriculture
Campylopterus phainopeplus	EN	N Colombia	N Colombia	Yes (both)	Conversion of forest to marijuana and coca plantations
Catharus bicknelli	VU	NE North America	The Caribbean	Yes (both)	In breeding grounds: acid precipitation in the 1960s and 1970s, ski-resort, communication and wind-power developments. In wintering grounds: agricultural conversion, logging and charcoal production.
Cephalopterus glabricollis	VU	Costa Rica and Panama	Costa Rica and Panama	Yes (both)	Forest loss and degradation, especially in its lowland non-breeding range.
Chlamydotis undulata	VU	Central Asia (Mongolia, Khazakstan, NW China, Turkmenistan, N Afghanistan, Uzbekistan). Resident in Middle East and N Africa.	NE China, SW Asia (W India, Pakistan, S Afghanista, E Iran). Resident in Middle East and N Africa.	No	The principal threat to the North Africa, Middle Eastern and western Asian populations is from hunting by Middle Easten falconers. Also, habitat degradation caused by tourist facilities; off-road vehicles; military exercises; overgrazing; sand extraction and road development.
Ciconia boyciana	EN	SE Russia and NE China	E China, Korea and Japan.	Yes (July)	Deforestation and drainage of wetlands for agricultural development are the main causes of decline in its breeding grounds. Reclamation of wetlands, particularly in the Yangtze basin, has reduced the area of habitat for wintering birds. Overfishing.
Circus maurus	VU	S Africa	S Africa	Yes (both)	Habitat loss for agriculture. Compounded by the uncontrolled burning of fynbos and grassland, which renders these habitats unsuitable for breeding for about five years. Alien vegetation and urbanisation are also cited as causes of habitat loss.
Columba eversmanni	VU	Central Asia (Khazakstan, NW China, Turkmenistan, N Afghanistan, Uzbekistan).	SW Asia (W India, Pakistan, S Afghanista, E Iran). Resident in Central Asia.	No	Changing agricultural practice (from the large-scale cultivation of pulses and mustard to wheat and rice in India) and hunting in its wintering grounds. Possibly habitat loss in its breeding grounds (Kazakhstan).
Columba punicea	VU	E and NE India	SouthEast Asia	Yes (both)	Hunting. Habitat loss and fragmentation owing to commercial logging, small-scale timber collection, and clearance of forests for plantation agriculture, cash-crops, charcoal production and shifting cultivation.
Columba thomensis	VU	Sao Tome	Sao Tome	Yes (both)	Deforestation and hunting
Compsospiza baeri	VU	N Argentina	N Argentina	Yes (both)	Habitat loss due to goats and cattle.
Conirostrum tamarugense	VU	Andes (Peru-Chile border)	Andes (Peru-Chile border)	Yes (both)	Small range?
Coturnicops exquisitus	VU	SE Russia and NE China	E China, Korea and Japan.	Yes (July)	Loss and fragmentation of wetlands in its breeding and wintering ranges (especially conversion to agriculture)
Cyanoramphus forbesi	EN	Mangere Islands (near New Zealand)	Mangere Islands (near New Zealand)	Yes (both)	Hybridisation with another species
Dendroica cerulea	VU	Eastern USA	N Andes (Colombia, Venezuela, Ecuador, Peru)	No	Degradation of habitat through land use change (to agricultural or urban areas in breeding grounds; and to pastureland, subsistence crops and coffee plantations)
Dendroica chrysoparia	EN	Texas	Central America	Yes (both)	Breeding habitat is under clearance for land development and agriculture. Logging and firewood-extraction, and agricultural conversion for cattle reducing pine-oak habitats in wintering grounds.
Ducula galeata	EN	Marquesas Islands	Marquesas Islands	Yes (both)	Hunting
Egretta eulophotes	VU	Korea, NE China	SouthEast Asia, Philipines, Brunei	Yes (July)	Reclamation of tidal flats, estuarine habitats and uninhabited offshore breeding islands for infrastructure, industry, aquaculture and agriculture, and through pollution.
Egretta vinaceigula	VU	Botswana	Zambia, Zimbabwe, Botswana	Yes (both)	The wetlands inhabited by this species face many threats (flood regulation, water abstraction, land-claim for agriculture, reed-cutting, fire, rice production and disturbance from tourists).
Emberiza aureola	VU	Russia, NE China, N Mongolia, N Kazakhstan	SouthEast Asia, NE India	No	Trapping on wintering grounds
Emberiza sulphurata	VU	N Japan	S Japan, Philipines	Yes (both)	Habitat loss, pesticide use and hunting throughout its range
Euphagus carolinus	VU	Canada, Alaska	Eastern USA	No	Poorly understood. Destruction and conversion of boreal wetlands
Eurynorhynchus pygmeus	CR	NE Siberia	Bangladesh, Myanmar.	Yes (both)	Throughout its migratory and wintering ranges, tidal flats are being reclaimed for industry, infrastructure and aquaculture and are becoming increasingly polluted.
Falco araea	VU	The Seychelles	The Seychelles	Yes (both)	Pesticide use, habitat destruction
Falco cherrug	VU	E Europe, Russia, Khazakstan, Mongolia, N China.	Sahel, E Africa, SE Europe, Middle East, SW Asia, C China	No	Unsustainable capture for the falconry trade (particularly in Middle East?). In Europe: agricultural intensification, plantation establishment and declines in sheep pastoralism.
Falco naumanni	VU	Medditeranean basin, Middle East, C Asia.	Sub-Saharan Africa	No	Agricultural intensification in Western Palearctic breeding ground, and in S Africa
Ficedula subrubra	VU	Kashmir	S India, Sri Lanka	Yes (both)	The major threat is loss and degradation of its breeding habitat as a result of commercial timber extraction, conversion of land for agriculture and livestock-grazing.
Gallinago nemoricola	VU	E Himalayas (Bhutan, Nepal)	Northern SouthEast Asia, NE India	Yes (both)	Habitat loss is the key threat, with substantial losses and degradation of evergreen forest, wooded wetlands, marshes and swamps in its wintering areas as a result of drainage, clearance for tea plantations, and conversion to both commercial and shifting agriculture. Hunting (China and SouthEast Asia). In Nepal at least, the species is threatened by high grazing pressure from livestock in its bre…
Geronticus eremita	CR	Morrocco, Syria	Morrocco, Ethiopia	Yes (both)	Various threats
Glareola ocularis	VU	Madagascar	E Africa, Madagascar	Yes (January)	The species may be threatened by anthropogenic modification of its habitat, especially its breeding areas on the east coast of Madagascar. In Kenya, large-scale conversion for agriculture. Urbanisation and pollution in Tanzania.
Gorsachius goisagi	EN	N Japan	Philipines	Yes (July)	The main threat is deforestation for timber and agriculture in both its breeding and non-breeding ranges.
Grantiella picta	VU	E Australia	E Australia	Yes (both)	Agriculture, grazing
Grus americana	EN	Texas, Florida	Florida	Yes (both)	Over-hunting, habitat conversion and human disturbance were the main causes of the species's decline. Currently the main threats are collisions with powerlines.
Grus antigone	VU	Cambodia. Resident in N India and S Myanmar.	S Vietnam. Resident in N India and S Myanmar.	No	The main threats are a combination of loss and degradation of wetlands, as a result of drainage and conversion to agriculture, ingestion of pesticides, and the hunting of adults.
Grus carunculatus	VU	NA	NA	No	NA
Grus japonensis	EN	SE Russia, NE China and N Japan	E China, Korea and N Japan.	Yes (both)	The key threat is the loss and degradation of wetlands in its breeding and wintering grounds, principally for conversion to agriculture, but also industrial and economic development
Grus leucogeranus	CR	NA	NA	Yes (both)	NA
Grus monacha	VU	SE Russia	E China, Korea and Japan.	Yes (January)	The key threats are wetland loss and degradation in its wintering grounds in China and South Korea. Other threats in China include pollution of coastal waters.
Grus nigricollis	VU	C and SW China	S China	Yes (both)	Intensive grazing and pesticide use has caused degradation of grasslands in the Ruoergai (Zoige) breeding grounds, China. Mechanised farming and draining of wetlands for settlement expansion are the major threats in Bhutan.
Grus vipio	VU	SE Russia and NE China	E China, Korea and Japan.	Yes (both)	In breeding grounds, threatened by steppe fires, whilst livestock grazing may cause disturbance and reduce the availability of suitable nesting habitat. In its wintering grounds, the main threats are from development and increasing human disturbance of wetlands in the Yangtze basin, the effects of the Three Gorges Dam on wetlands in the Yangtze basin.
Gyps coprotheres	VU	S Africa, Botswana	S Africa, Botswana, Zimbabwe	Yes (July)	Multitude of threats. Sixteen known or suspected mortality factors were identified, the most important factors being: decrease in the amount of carrion (particularly during chick-rearing), inadvertent poisoning, electrocution on pylons or collision with cables, loss of foraging habitat and unsustainable harvesting for traditional uses.
Haliaeetus leucoryphus	VU	Central Asia (Mongolia, Khazakstan, N and C China, Uzbekistan). Resident in N India, Bangladesh, Myanmar, Pakistan, Afghanistan.	S Uzbekistan, W Turkmenistan. Resident in N India, Bangladesh, Myanmar, Pakistan, Afghanistan.	No	Across the Indian subcontinent, and probably most of its range, wetlands have been drained or converted for agriculture and human settlements. Pollution of wetlands with pesticides and industrial effluents reduces breeding success. In China, hunting is a localised problem
Haliaeetus pelagicus	VU	NE Russia	SE Russia, N Japan	No	It is threatened by habitat alteration during the development of hydroelectric power projects, proposed large-scale coastal and offshore developments for the petrochemical industry, and logging for timber. Also pollution and over-fishing are threats.
Heliopais personatus	EN	Cambodia, Vietnam	Malaysia, Sumatra, Bangladesh, NE India.	Yes (both)	Disturbance of rivers in lowland riverine forest, driven by agricultural clearance and logging operations and increased traffic on waterways
Himantopus novaezelandiae	CR	New Zealand	New Zealand	Yes (both)	Predators, in particular introduced mammals
Hirundo atrocaerulea	VU	SE Africa	Uganda	Yes (both)	Threatened by destruction and degradation of its grassland and wetland habitats on both its breeding grounds and its non-breeding grounds, to afforestation, intense human settlement, cultivation, intensive livestock-farming, intense grazing, intensive grass-burning and invasion by non-native trees.
Houbaropsis bengalensis	CR	Resident in Cambodia, Bhutan and Nepal	S Vietnam. Resident in Cambodia, Bhutan and Nepal	Yes (both)	The key threats are the extensive loss and modification of grasslands through drainage, conversion to agriculture and plantations, overgrazing, inappropriate cutting, burning and ploughing regimes, heavy flooding, invasion of alien species, scrub expansion, dam construction and inappropriate and illegal development. In particular, the spread of dry season rice cultivation in Cambodia is rapidly c…
Larus atlanticus	VU	Coast of Argentina and Uruguay	Coast of Argentina and Uruguay	Yes (both)	Urban development, industry, agriculture, recreation, fishing, and pollution
Larus bulleri	EN	New Zealand	New Zealand	Yes (both)	Mammals predators. The recreational use of riverbeds and coastal areas is increasing, causing greater disturbance of nesting colonies
Larus relictus	VU	Mongolia, N China	S Korea	Yes (January)	Human disturbance has caused increased mortality of eggs and chicks in Russia and China, by making them vulnerable to bad weather, predation and desertion. In South Korea, most of the mudflats at the Nakdong estuary have been reclaimed. The major wintering area at Bohai Bay, China, has been affected by reclamation for oilfields, harbours, roads and other developments.
Larus saundersi	VU	Coasts of China, Japan and Korea	Coasts of China, Japan and Korea	Yes (July)	The key threat is reclamation of tidal flats and saltmarshes
Lathamus discolor	EN	Tasmania	SE Australia	Yes (both)	In Tasmania, breeding habitat is significantly reduced and fragmented through clearance of E. globulus for agriculture, residential development, plantation timber, sawlog production and clear-felling for woodchips
Leipoa ocellata	VU	S Australia	S Australia	No	Clearance for agriculture has eliminated much habitat and some patches are affected by raised salinity levels, resulting in fragmented populations and a higher risk of localised extinction from starvation and bushfires
Leptoptilos dubius	EN	Bhutan, Cambodia	Nepal, Cambodia	Yes (both)	The key threats are direct exploitation, particularly at nesting colonies, habitat destruction, including some felling of nest-trees, and drainage, conversion, pollution and over-exploitation of wetlands
Leptoptilos javanicus	VU	India, SouthEast Asia	India, SouthEast Asia	No	In many areas, drainage and conversion of wetland feeding areas, agricultural intensification, increased pesticide use and disturbance, the collection of eggs and chicks and the hunting of adults are major threats. Coastal populations are threatened by large-scale development, including aquaculture and the clearance of mangroves.
Locustella pleskei	VU	S Korea	Poorly known. Vietnam?	Yes (both)	The main threats are likely to be habitat loss and degradation
Marmaronetta angustirostris	VU	Spain, Sicilia, Turkey, Georgia. Resident in C Asia, Middle East and N Africa.	Morrocco, Sahel, Middle East, SW Asia. Resident in C Asia, Middle East and N Africa.	No	Wetland drainage for agriculture occurs across its range, most significantly in Iraq where the species remains threatened by fluctuating water levels and local water shortages. Pollution from agricultural, industrial and domestic sources is a threat at many sites.
Megadyptes antipodes	EN	New Zealand	New Zealand	Yes (both)	Introduced ferret Mustela furo, stoat M. erminea and cats are major predators in the South Island. Disease appears to be a major problem in some populations in some years.
Mergus squamatus	EN	SE Russia and NE China	E China, Korea and Japan.	Yes (July)	Major threats within the breeding range include economic development of the taiga, illegal hunting, drowning in fishing nets, disturbance from motor boats during the breeding season, river pollution and natural predators. In South Korea, the species is impacted by increased river turbidity due to construction and dredging, bridge-building activities, river-bank strengthening and road-widening sch…
Mycteria cinerea	VU	Resident in Sumatra, Malaysia, Cambodia	S Cambodia, Java. Resident in Sumatra, Malaysia, Cambodia	Yes (both)	In Indonesia, tidal forests including mangroves are threatened by agricultural conversion and development schemes, particularly large-scale fish farms and tidal rice cultivation, logging. Hunting for food and trade also exerts a significant pressure throughout its range
Neophema chrysogaster	CR	Tasmania	SE Australia	Yes (both)	The primary reason for the species's decline is thought to be fragmentation and degradation of overwintering habitat by grazing, agriculture and urban and industrial development
Neophron percnopterus	EN	Medditeranean basin, Middle East, C/SW Asia. Resident in Sahara, Arabian Peninsula, India	Sahel, E Afica. Resident in Sahara, Arabian Peninsula, India	No	This species faces a number of threats across its range. Disturbance, poisoning, electrocution (by powerlines), collisions with wind turbines, reduced food availability and habitat change are currently impacting upon European populations. Declines in parts of Africa are likely to have been driven by loss of wild ungulate populations. Diclofenac poisoning.
Numenius madagascariensis	VU	SE Russia and NE China	Coasts of Japan, China, E Indonesia, Australia	Yes (July)	Habitat loss on the Yellow Sea staging grounds is probably the primary threat to the species. Wetland degradation in the Yellow Sea may affect the species where it stages on migration
Numenius tahitiensis	VU	Alaska	Islands of Pacific Ocean	Yes (July)	Introduced predators, especially dogs, but also cats and possibly pigs are likely to predate flightless birds on wintering grounds. The species may suffer some loss and degradation of its habitats through clearance for coconut plantations and proliferation of coconut groves where not harvested
Numenius tenuirostris	CR	Siberia	S Europe	No	There has been extensive drainage of wetlands in the Mediterranean and North Africa and potentially important areas in Iraq. The conversion of European wetlands and central European steppes to arable farmland may have heavily impacted the species in depriving it of important habitats during migration
Oriolus mellianus	VU	S China	Thailand, Cambodia	Yes (both)	The main threat is the loss and fragmentation of forest in its breeding and wintering ranges through timber extraction, conversion to agriculture and uncontrolled fire. Hunting may also be a factor in Cambodia.
Otis tarda	VU	SE/SW Russia, NE China, Mongolia, Kazakhstan. Resident in Europe	E China, N Iran, Middle East, Turkey, SE Europe. Resident in Europe	No	Key threats are increased habitat degradation, fragmentation and loss due to agricultural intensification, land-use changes and infrastructure development which has the potential to increase following land privatisation in eastern Europe and is occurring in China. Hunting is a major threat in Morocco, Syria, Turkey, Ukraine, China, Kazakhstan and Mongolia
Oxyura leucocephala	EN	S/SW Russia, Kazakhstan, Georgia	SW Asia, Middle East, SE Europe	Yes (January)	The greatest long-term threat to the species survival is thought to be competition and introgressive hybridisation (i.e. genetic swamping) with the non-native North American Ruddy Duck Oxyura jamaicensis. Climate change is thought to be causing more frequent droughts and drying out of many lakes in central Asia which may be a great threat to the survival of the species
Palmeria dolei	CR	Hawai	Hawai	Yes (both)	Grazing by feral goats, with an imminent threat from feral deer posing a new pressure. A particular concern is the possible introduction of a disease-carrying mosquito species tolerant of the cooler climate at higher altitudes, thereby bringing currently safe populations of birds into contact with lethal diseases.
Pelecanus crispus	VU	S/SW Russia, NW China, Kazakhstan, Georgia	E China, SW Asia, Middle East, SE Europe	Yes (July)	Former declines were primarily caused by wetland drainage, shooting and persecution by fishers. Hunting is considered one of the main threats for the E Asian population. Threats include disturbance from tourists and fishers, wetland alteration and destruction, water pollution, collision with overhead power-lines and over-exploitation of fish stocks. The breeding colonies in Mediterranean lagoons …
Phalacrocorax campbelli	VU	Campbell Island (near New Zealand)	Campbell Island (near New Zealand)	Yes (both)	Small range?
Phalacrocorax featherstoni	EN	Chatham Islands (near New Zealand)	Chatham Islands (near New Zealand)	Yes (both)	Small range? Introduced predators?
Phalacrocorax harrisi	EN	Galapagos	Galapagos	Yes (both)	Its flightlessness and disinclination to disperse render it extremely susceptible to human disturbance (Levéque 1963) and catastrophes such as oil spills
Phalacrocorax neglectus	EN	Coasts of S Africa and Namibia	Coasts of S Africa and Namibia	No	Fishery, Oil-spills
Phalacrocorax ranfurlyi	VU	Bounty Islands (near New Zealand)	Bounty Islands (near New Zealand)	Yes (both)	Small range?
Phoenicoparrus andinus	VU	Andes (Peru-Chile border)	Andes (Peru-Chile border)	Yes (both)	The collecting of eggs to sell as food was intensive in the mid-20th century and the early 1980s. Mining activities, unfavourable water-levels (owing to weather and manipulation), erosion of nest-sites and human disturbance may also affect productivity
Phylloscopus ijimae	VU	Japan	Japan, Taiwan, Philipines	Yes (both)	It is threatened by habitat loss in the Izu Islands. On Miyake-jima, large areas of natural forest have been replaced with the fast-growing softwood Cryptomeria japonica for timber production. Road construction and developments for tourism in breeding grounds. Another contributory factor to its decline may be the increased use of pesticides and other agrochemicals in its breeding range
Pitta nympha	VU	Japan, SE China	Borneo	Yes (both)	Deforestation in its breeding range, principally for agriculture and timber. hunting is a threat in China
Platalea minor	EN	Korea, NE China	Japan, SE China	Yes (both)	Loss of habitat to industrial development, land reclamation, and pollution. The main wintering grounds are threatened by industrial development, particularly a key site in Taiwan and also in China, and reclamation, especially in South Korea, Japan and China. Economic development in China has converted many coastal wetlands into aquaculture ponds and industrial estates
Podiceps gallardoi	EN	W Patagonia	E Patagonia	Yes (both)	The two principal threats to the species appear to be climate change and the introduction of salmon and trout to private lakes on the Strobel plateau
Polysticta stelleri	VU	N Siberia	Lapland, E Russia, Alaska	Yes (January)	Hunting. Habitat loss also occurs through prospecting for, and the exploitation of, natural resources such as oil and gas
Polytelis swainsonii	VU	SE Australia	SE Australia	Yes (both)	Range contraction is largely the result of clearing for agriculture
Procnias tricarunculatus	VU	Central America	Central America	Yes (both)	Deforestation. There is ongoing habitat loss, especially in lowland wintering areas. The Caribbean lowlands are suffering conversion to banana plantations, cattle-ranches and logging.
Rhynchopsitta pachyrhyncha	EN	W Mexico	NW Mexico	Yes (both)	There has been extensive modification of old-growth pine forests for timber and woodpulp. Fire remains a serious threat to the species
Rhynchopsitta terrisi	VU	NE Mexico	NE Mexico	Yes (both)	Intensive grazing and agricultural conversion have destroyed and degraded forest. Annual fires burn large areas of foraging habitat. The species is affected by some trapping and shooting
Rynchops albicollis	VU	C/N India, Myanar, Pakistan	W India, Bangladesh, Nepal	Yes (both)	Its decline is attributable to widespread increases in human disturbance, exploitation and degradation of rivers and lakes through fishing, transportation, domestic use, irrigation schemes and pollution from agricultural and industrial chemicals.
Sarothrura ayresi	EN	Ethiopia	Ethiopia, S Africa	Yes (both)	Seasonal marshes are threatened by drainage (for cultivation and forestry), flooding by dams, catchment erosion, water abstraction, human disturbance, too-frequent burning, and excessive trampling and grazing by livestock and cutting of marsh vegetation for fodder. In Ethiopia, a serious problem is the rapid growth in the numbers of livestock. The peatlands of South Africa are threatened by culti…
Saxicola insignis	VU	Mongolia	Nepal	Yes (both)	The major threat appears to be rapid and extensive loss and modification of grasslands in its wintering grounds, as a result of drainage, conversion to agriculture (although it appears to have partially adapted to sugarcane), overgrazing, grass harvesting for thatch production and inappropriate grassland management
Saxicola macrorhynchus	VU	NW India	NW India	Yes (both)	Agricultural intensification and encroachment
Serinus syriacus	VU	Jordan, Lebanon	Israel, Sinai	Yes (both)	The species is potentially seriously affected by excessive tree-cutting, grazing and water abstraction. Hunting may be a potential threat in some parts of the range
Spheniscus demersus	EN	Coasts of Southern Africa	Coasts of Southern Africa	Yes (both)	Commercial fisheries and shifts in prey populations.
Sporophila cinnamomea	VU	Paraguay, Uruguay	S Brazil	Yes (both)	Heavy trapping pressure is compounded by extensive habitat conversion. Pesticides and other chemicals are carried by drainage and run-off directly into marshes (Clay et al. in prep.). Mechanised agriculture, invasive grasses and annual burning additionally threaten winter and migration habitats
Sporophila nigrorufa	VU	E Bolivia	Mato Grosso	Yes (both)	The effects of extensive and continuing conversion of grassland habitats to agriculture are
Sporophila palustris	EN	Uruguay	S Brazil	Yes (both)	Heavy trapping pressure has extirpated the species from parts of Argentina and threatens populations in the río Uruguay basin
Sterna albostriata	EN	New Zealand	New Zealand	Yes (both)	Introduced predators, recreation
Sterna bernsteini	CR	E China	Indonesia	Yes (both)	Many coastal wetlands in its presumed breeding range in eastern China are affected by large-scale development projects
Sturnella defilippii	VU	NE Argentina, Uruguay	NE Argentina, Uruguay	Yes (both)	Rapid and widespread conversion to cattle-ranching, arable and plantation agriculture are primarily responsible for long-term declines.
Tachycineta cyaneoviridis	EN	N Caribbeans	N Caribbeans	Yes (both)	Logging of pines in the northern Bahamas has probably had a major impact
Tangara peruviana	VU	SE Brazil	SE Brazil	Yes (both)	It is threatened by the rapid and widespread loss of restinga, largely to beachfront real-estate development and holiday centres.
Torgos tracheliotos	VU	Africa, Arabia	Africa, Arabia	No	Widespread accidental poisoning, largely due to strychnine, used by many farmers for predator control, and more recently carbofuran. It is also often mistakenly persecuted as a livestock predator. Other major threats to the species include nest predation by humans, reduced food availability and electrocution
Touit costaricensis	VU	Costa Rica and Panama	Costa Rica and Panama	Yes (both)	The widespread destruction of its foothill and highland forests is primarily the result of burning, small-scale logging operations and other conversion for intensive agricultural use. In Panama, deforestation is also taking place for urban and tourism development in highlands
Toxostoma bendirei	VU	NW Mexico, SW USA	NW Mexico, SW USA	Yes (both)	Populations have been eliminated by dense urbanisation around Tucson and by large scale agriculture along the Gila River
Tringa guttifer	EN	SE Russia	Bangladesh, Malaysia, Sumatra, Brunei	Yes (both)	The key threats are the development of coastal wetlands throughout Asia for industry, infrastructure and aquaculture, and the degradation of its breeding habitat in Russia by grazing reindeer. Observations suggest that hunting is a significant threat at breeding sites in Russia.
Turdus feae	VU	Resident in NE China.	Bangladesh, Myanmar. Resident in NE China.	Yes (both)	It is threatened by the continued loss and fragmentation of its habitat, principally in its breeding range. Forests in Thailand and Myanmar have been affected by shifting agriculture, wood-collection and fires, but the extent of these threats has declined in this area and some forest is regenerating
Vanellus gregarius	CR	Kazakhstan	Middle East, NW India, Pakistan	No	Poorly known. On the breeding grounds, it was probably formerly threatened by the conversion of steppe to arable cultivation. Illegal hunting during migration and on the wintering grounds may now be the primary threat
Vireo atricapilla	VU	Texas, NE Mexico	Pacific coast of Mexico	Yes (both)	Fire suppression is probably the most serious threat, but urban development and agricultural conversion (especially to pasture) have caused significant habitat loss in Oklahoma, northern and central Texas. The wintering habitat has been modified by changes in land use by reducing the potential suitable area or causing habitat fragmentation and reduced quality of winter habitat
Xanthomyza phrygia	EN	SE Australia	SE Australia	Yes (both)	About 75% of its habitat has been cleared for agricultural and residential development.
Xanthopsar flavus	VU	SE Brazil, Paraguay, Uruguay	SE Brazil, Paraguay, Uruguay	Yes (both)	It has declined owing to a number of human impacts on grasslands, including stock-raising, cultivation, pesticides, burning, pine and eucalypt plantations, drainage and settlement
Zaratornis stresemanni	VU	Peru	Peru	Yes (both)	Uncontrolled fires and heavy grazing prevent Polylepis regeneration. Cutting for timber, firewood and charcoal is locally destructive
Zoothera guttata	EN	E, SE Africa	E, SE Africa	Yes (both)	In Tanzania, coastal forest patches that are probably "stepping stones" during migration are under heavy pressure and becoming increasingly fragmented. Pugu Forest is being degraded as a result of charcoal production. In South Africa, mining has destroyed much wintering habitat and may affect more forest in the near future
Statistics
	Number of threatened migratory species	Fraction of all threatened migratory species	Number of narrow-range threatened migratory species	Proportion of narrow-range species
Eurasia	64	0.484848	44	0.6875
Africa	23	0.174242	14	0.608696
N America	19	0.143939	16	0.842105
S America	16	0.121212	15	0.9375
Australasia	27	0.204545	22	0.814815
